# Supplementary material
Source: publisher figshare collection journal article supplement (https://gsapubs.figshare.com/ndownloader/files/23305697)
Supplement: Supplementary file 1 [file 23305697]

**Turab, S.A., Stüwe, K., Stuart, F.M., Chew, D.M., and Cogne, N., 2017, Tectonics drives rapid exhumation of the western Himalayan syntaxis: Evidence from low-temperature thermochronometry of the Neelum River region, Pakistan: Lithosphere, doi:10.1130/L626.1.**

**GSA Data Repository Item 2017319**

### **SUPPLEMENTARY MATERIAL**

#### **Standard Lab Procedures**

Apatite and zircon were separated from rock samples by crushing, sieving, gravity separation using Wilfley table, magnetic separation and heavy liquid separation using sodium polytungstate and di-iodomethane at University of Graz. AFT analyses were carried out at Trinity College Dublin. Samples were etched in 5.5 M HNO<sub>3</sub> for 20 seconds at 21°C (after Donelick et al., 2005). Laser-ablation inductively coupled plasma mass spectrometry (LA-ICP-MS) was used to determine uranium concentrations for fission-track dating (Donelick et al., 2005; Chew and Donelick, 2012). These analyses also provided apatite Cl concentrations (Chew et al., 2014a) and apatite U–Pb age data (Fig. S1; Chew et al., 2014b).

For apatite (AHe) and zircon (ZHe) (U–Th–Sm)/He analysis, single, euhedral, inclusion-free crystals were handpicked, measured and packed in Pt foil tubes. Helium was extracted by heating the Pt foils with a 808 nm diode laser at 600 – 700°C for 60 seconds (apatite) and at ~1200°C for 20 minutes (zircon) (Foeken et al., 2006). Helium was measured using a Hiden HAL3F quadrupole mass spectrometer. Apatite-bearing packets were then removed from the He extraction line, spiked with <sup>235</sup>U and <sup>230</sup>Th in 5% nitric acid and left at 80°C for 48 hours in sealed Teflon beakers. Zircon crystals were removed from the tubes before being dissolved in 49% HF at 235°C for 48 hours in a Parr bomb (Dobson et al., 2008). <sup>238</sup>U, <sup>235</sup>U and <sup>232</sup>Th contents were determined via isotope dilution ICP-MS (Balestrieri et al., 2005). Durango apatite and Fish Canyon Tuff zircon were used as mineral age standards. The AHe and ZHe ages were calculated according to established procedures (Meesters and Dunai, 2005), and the ages corrected for alpha recoil (Farley et al., 1996; Ketcham et al., 2011).

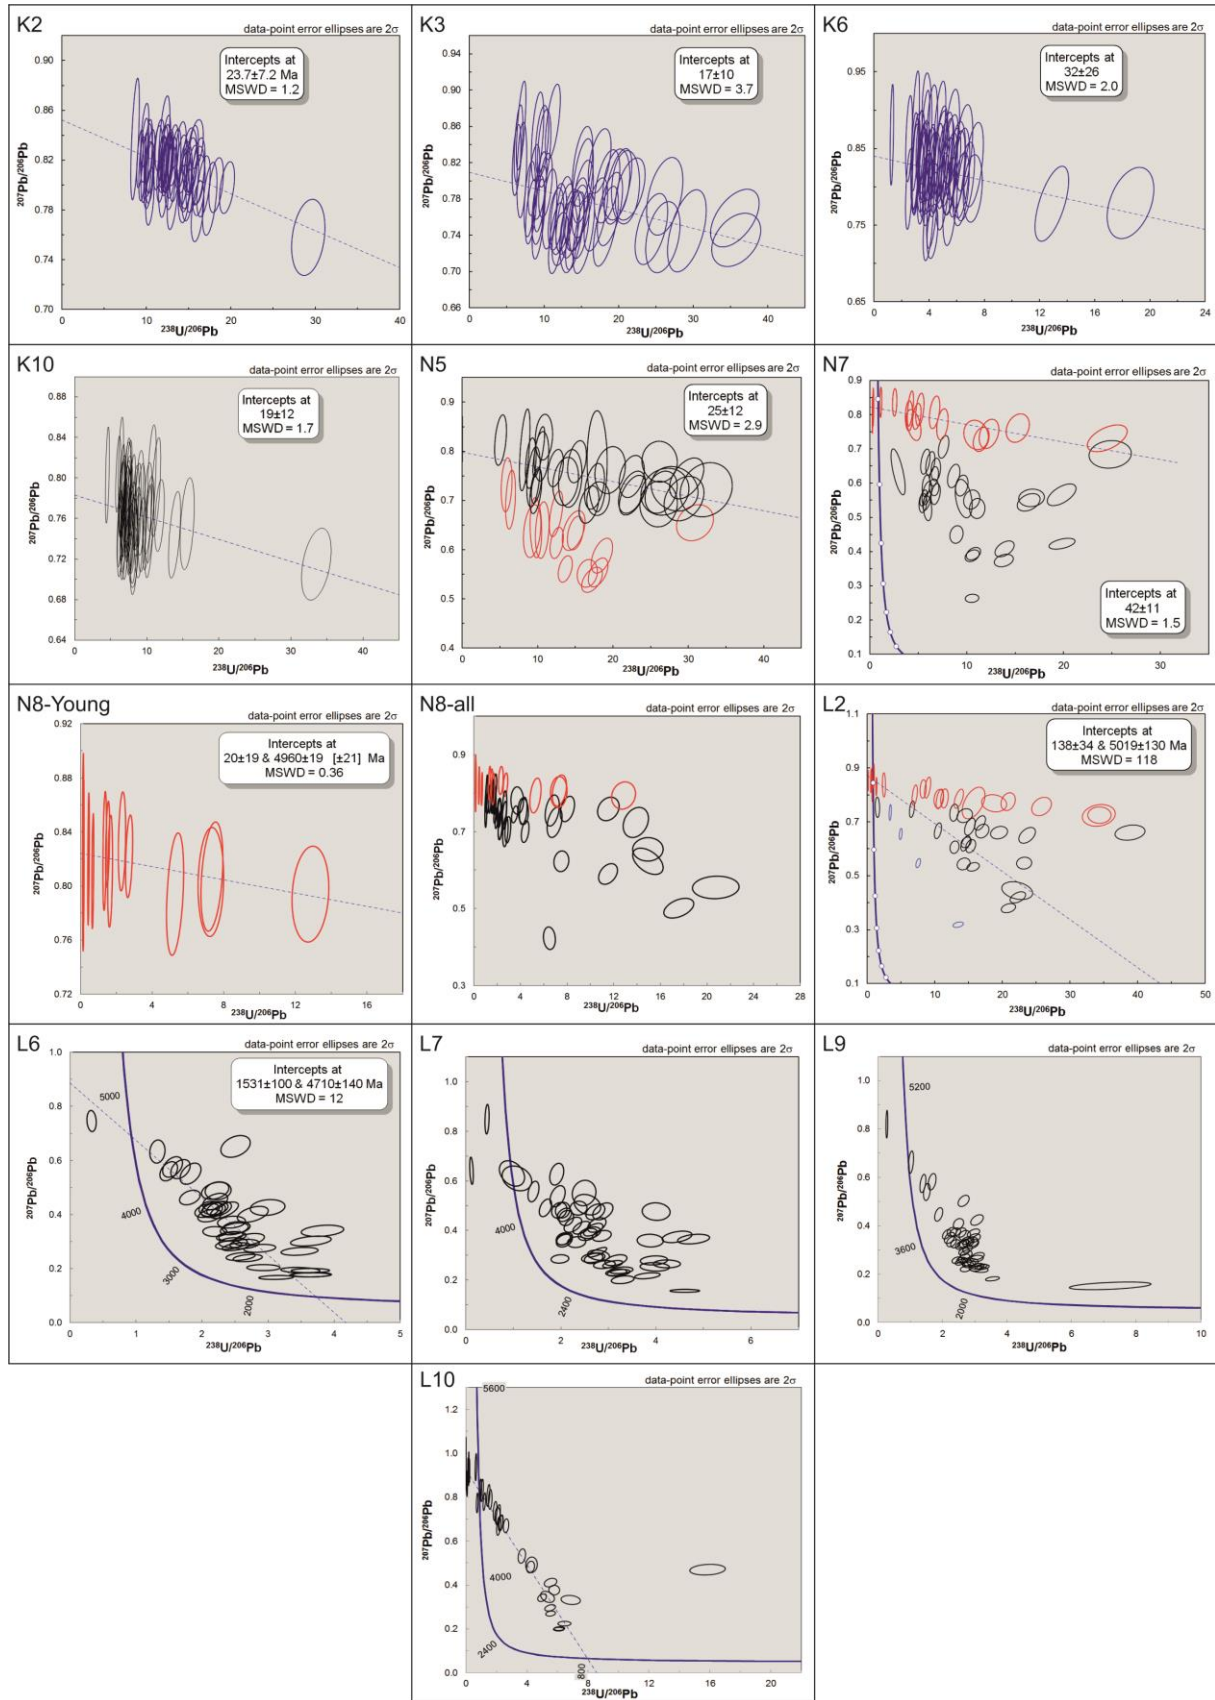

Figure S1. Tera-Wasserburg Concordia diagrams for all the samples dated using U-Pb method on apatite. Note that for partly reset samples (i.e. N5, N7, N8 and L2) ellipses with different colours indicate data from young and old apatite grains whereby data from only young grains is used for age calculation.

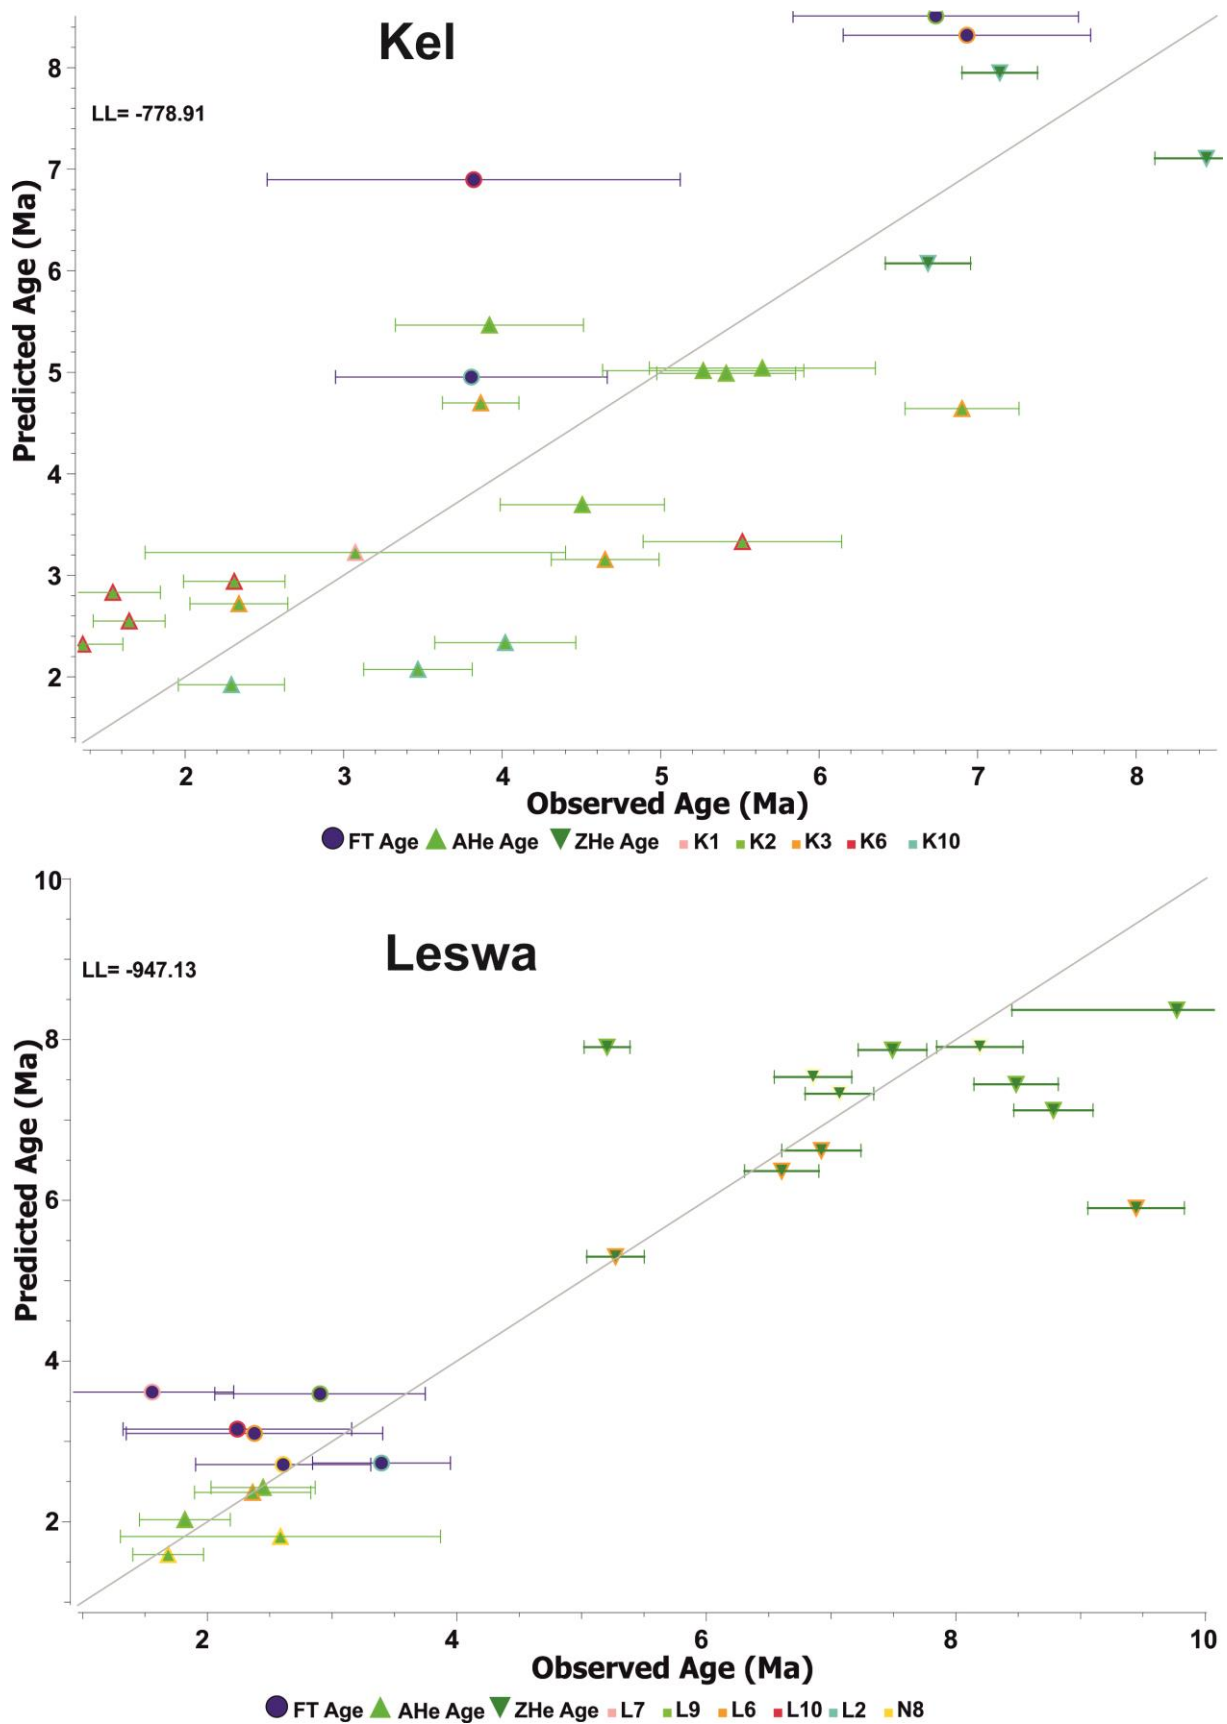

Figure S2. Thermal history modelling results for Kel and Leswa profiles showing observed versus predicted ages. LL: Log Likelihood.

## REFERENCES CITED

- Balestrieri, M.L., Stuart, F.M., Persano, C., Abbate, E., and Bigazzi, G., 2005, Geomorphic development of the escarpment of the Eritrean margin, southern Red Sea from combined apatite fission-track and (U–Th)/He thermochronometry: *Earth and Planetary Science Letters*, v. 231, p. 97–110, doi:10.1016/j.epsl.2004.12.011.
- Chew, D.M., and Donelick, R.A., 2012, Combined apatite fission track and U–Pb dating by LA-ICPMS and its application in apatite provenance analysis. *in* Sylvester, P., ed., *Quantitative Mineralogy and Microanalysis of Sediments and Sedimentary Rocks: Mineralogical Association of Canada Short Course Series 42*, p. 219–247.
- Chew, D.M., Donelick, R.A., Donelick, M.B., Kamber, B.S., and Stock, M., 2014a, Apatite chlorine concentration measurements by LA-ICP-MS: *Geostandards and Geoanalytical Research*, v. 38, no. 1, p. 23–35, doi:10.1111/j.1751-908X.2013.00246.x.
- Chew, D.M., Petrus, J.A., and Kamber, B.S., 2014b, U–Pb LA-ICPMS dating using accessory mineral standards with variable common Pb: *Chemical Geology*, v. 363, p. 185–199.
- Dobson, K.J., Stuart, F.M., Dempster, T.J., and EIMF, 2008, U and Th zonation in Fish Canyon Tuff zircons: Implications for a zircon (U–Th)/He standard: *Geochimica et Cosmochimica Acta*, v. 72, no. 19, p. 4745–4755, doi:10.1016/j.gca.2008.07.015.
- Donelick, R.A., O’Sullivan, P.B., and Ketcham, R.A., 2005, Apatite fission-track analysis, *in* Reiners, P.W., and Ehlers, T.E., eds., *Low-temperature Thermochronology: Techniques, Interpretations, and Applications: Reviews in Mineralogy and Geochemistry*, v. 58, p. 49–94.
- Farley, K.A., Wolf, R.A., and Silver, L.T., 1996, The effects of long alpha-stopping distances on (U–Th)/He ages: *Geochimica et Cosmochimica Acta*, v. 60, no. 21, p. 4223–4229, doi:10.1016/S0016-7037(96)00193-7.
- Foeken, J.P.T., Stuart, F.M., Dobson, K.J., Persano, C., and Vilbert, D., 2006, A diode laser system for heating minerals for (U–Th)/He chronometry: *Geochemistry, Geophysics, Geosystems (G3)*, v. 7, no. 4, Q04015, 9 p., doi:10.1029/2005GC001190.
- Ketcham, R.A., Gautheron, C., and Tassan-Got, L., 2011, Accounting for long alpha-particle stopping distances in (U–Th–Sm)/He geochronology: Refinement of the baseline case: *Geochimica et Cosmochimica Acta*, v. 75, no. 24, p. 7779–7791, doi:10.1016/j.gca.2011.10.011.
- Meesters, A.G.C.A., and Dunai, T.J., 2005, A non-iterative solution of the (U–Th)/He age equation: *Geochemistry, Geophysics, Geosystems (G3)*, v. 6, no. 4, Q04002, 3 p., doi:10.1029/2004GC000834.
